# Supplementary material for: Facile One-Pot Synthesis of Nickel Nanoparticles by Hydrothermal Method
Source: MDPI journal article supplement (doi:10.3390/ma16010076), 2022-12-21
Supplement: s1 [file s1]

# Facile One-Pot Synthesis of Nickel Nanoparticles by Hydrothermal Method

Gawon Kim <sup>1,2</sup>, Chan Woong Na <sup>2</sup> and Yoon Myung <sup>2,\*</sup>

<sup>1</sup> Department of Nanoscience and Engineering, Inje University, 197 Inje ro, Gimhae 50834, Republic of Korea

<sup>2</sup> Dongnam Regional Division, Korea Institute of Industrial Technology, Busan 46938, Republic of Korea

\* Correspondence: myungyoon@kitech.re.kr

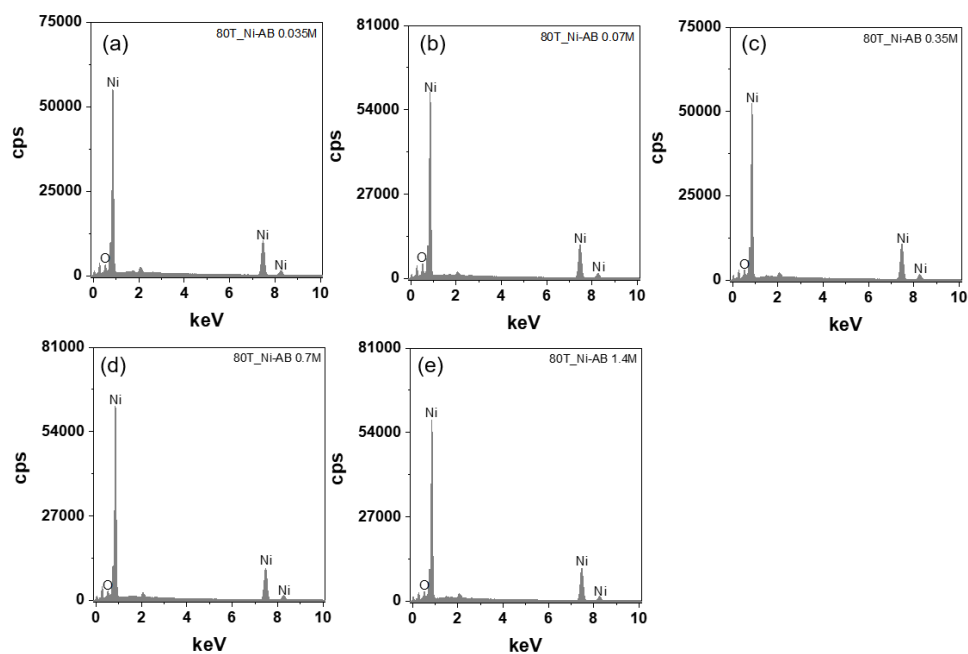

**Figure S1.** EDX data of synthesized Ni nanoparticles at 80 °C with different concentration ratio of Ni:AB as (a), 1:0.1. (b), 1:0.2 (c) 1:1, (d) 1:2, and (e) 1:4 respectively.

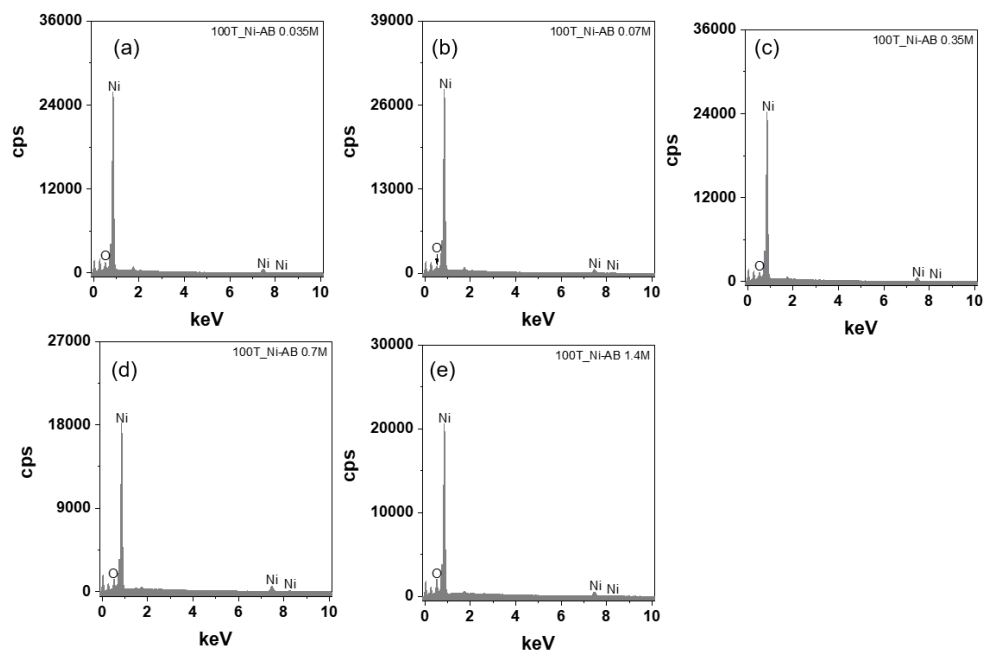

**Figure S2.** EDX data of synthesized Ni nanoparticles at 100 °C with different concentration ratio of Ni:AB as (a), 1:0.1. (b), 1:0.2 (c) 1:1, (d) 1:2, and (e) 1:4 respectively.

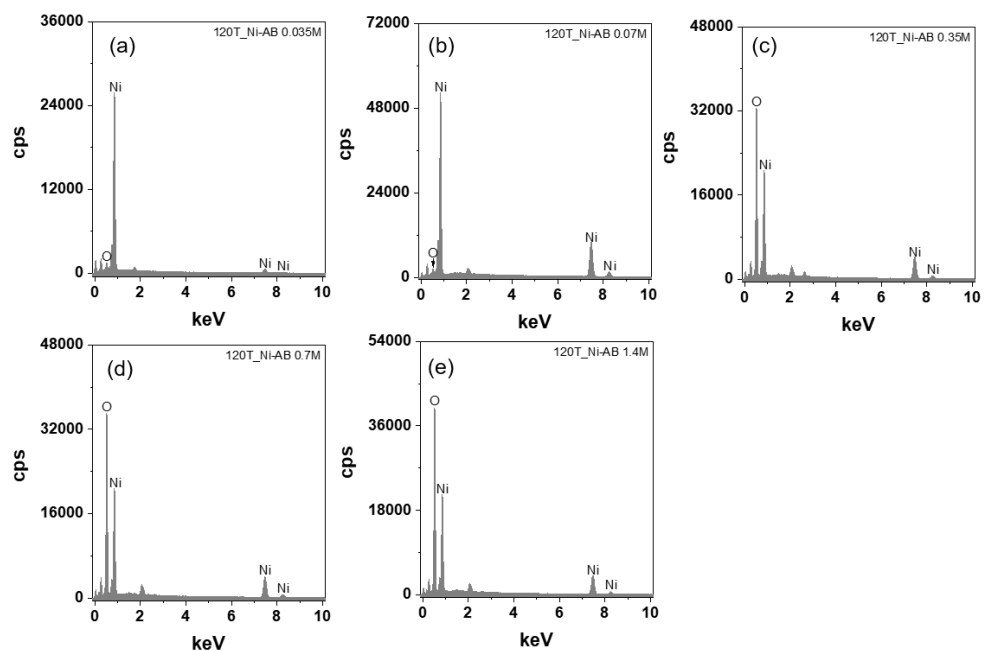

**Figure S3.** EDX data of synthesized Ni nanoparticles at 120 °C with different concentration ratio of Ni:AB as (a), 1:0.1. (b), 1:0.2 (c) 1:1, (d) 1:2, and (e) 1:4 respectively.

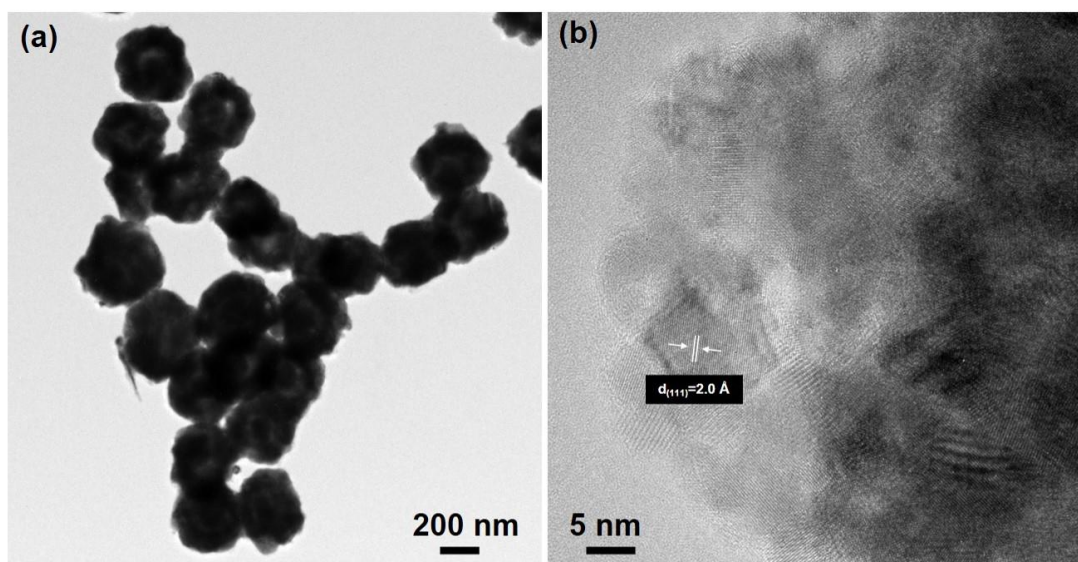

**Figure S4.** (a) TEM image of synthesized Ni nanoparticles at 120 °C with 1:0.2 ratio, (b) lattice resolved image of Ni nanoparticles.

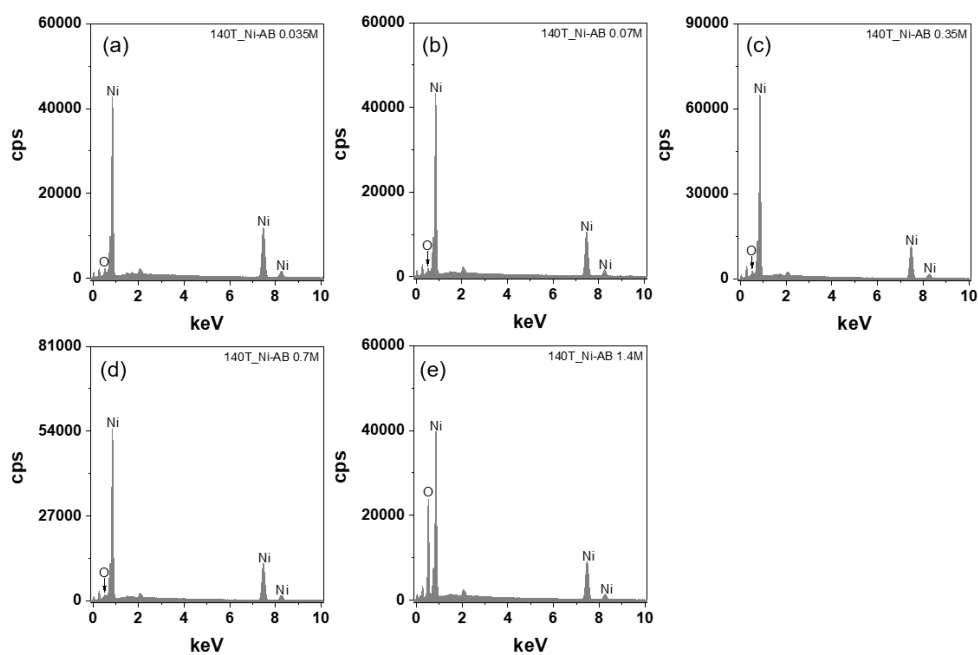

**Figure S5.** EDX data of synthesized Ni nanoparticles at 80 °C with different concentration ratio of Ni:AB as (a), 1:0.1. (b), 1:0.2 (c) 1:1, (d) 1:2, and (e) 1:4 respectively.
